# Supplementary material
Source: PubMed Central journal article supplement (PMC5721092)
Supplement: 13139_2017_491_MOESM2_ESM.pdf [file 13139_2017_491_MOESM2_ESM.pdf]

Supplemental Table 1. Characteristics of the healthy volunteers for planar scintigraphy (n = 12)

|                                     |              |
|-------------------------------------|--------------|
| Age (years)                         | 25.0 ± 6.34  |
| Male:female ratio                   | 6:6          |
| Blood chemistry                     |              |
| Serum creatinine (mg/dL)            | 0.88 ± 0.28  |
| eGFR* (mL/min/1.73 m <sup>2</sup> ) | 100.0 ± 20.8 |
| Total protein (g/dL)                | 7.46 ± 0.54  |
| Albumin (g/dL)                      | 4.72 ± 0.34  |
| AST† (IU/L)                         | 21.8 ± 7.84  |
| ALT‡ (IU/L)                         | 16.9 ± 7.88  |
| Urinalysis                          |              |
| Albuminuria                         | None         |
| Glycosuria                          | None         |

\*Estimated GFR using the abbreviated Modification of Diet in Renal Disease formula: eGFR

(mL/min/1.73 m<sup>2</sup>) =  $175 \times \text{sCr}^{-1.154} \times \text{age}^{-0.203} \times (0.742 \text{ if female})$

†AST, aspartate aminotransferase

‡ALT, alanine aminotransferase
